# Supplementary material for: Retrieving coal mine CH 4 emissions using UAV-based AirCore observations and the GA-IPPF model
Source: Copernicus journal article supplement (doi:10.5194/acp-2022-180), 2022-06-07
Supplement: Supplementary file 1 [file acp-2022-180-supplement.pdf]

**Supplement of**  
**Retrieving CH<sub>4</sub> Emissions from Coal sampled with UAV-based Aircore system by**  
**using GA-IPPF model**

**Tianqi Shi et al**

Correspondence to: Xin Ma([maxinwhu@whu.edu.cn](mailto:maxinwhu@whu.edu.cn)); Huilin Chen ([huilin.chen@rug.nl](mailto:huilin.chen@rug.nl))

**S1. Introduction for GA-IPPF**

The main advantage of GA-IPPF is that it can retrieving methane emission sources without diffusion parameters. When supplied with concentration data, meteorological data, and location information, the emission characteristics can be precisely determined by GA-IPPF. The function of the genetic algorithm (GA) is to define the range of each unknown parameters, and the IPPF would calculate final solutions of each unknown parameters based on the domain determined by GA. The specific explanation of the two algorithms is presented as follows:

**S 1.1 Genetic algorithm**

GA is a kind of bionic algorithms that draw on natural selection in biology. By simulating the evolution of an artificial population, the GA retains a set of suitable individuals in each iteration after selection, crossover, and mutation, and the population evolves over several generations, i.e., many iterations, and the final retained individuals will result in an approximately optimal fitness function. Detailed steps are as follows:

Step 1: In this study, we selected real number encoding method for GA. That is encoding the floating point number itself, including dispersion parameters, wind and other unknown parameters in formula 1.

Step 2: Initializing populations. Maximum number of evolutionary generations in this section is set as 1000, the number of initial populations is set as 900. The individuals are randomly generated within the selected range, that is the lower boundary and upper boundary in this article.

Step 3: Calculate fitness function. The fitness function is the criterion for judging the strengths and weaknesses of individuals,  $F$  is regarded as fitness function in this step, obviously, we want to find the individual with the smallest value of fitness in the genetic iteration.

$$F = \sum_{i=1}^n (C_m^i - C_s^i)^2 \quad \text{ES1}$$

Step 4 :Selection. The purpose of selection is to select multiple pairs of superior individuals from the current population, each pair of superior individuals is called a pair of parents, and let the parents generate new offspring by crossover and mutation until the number of individuals in the next generation reaches the population limit. There are many ways of selection, in this article, we choose the roulette wheel method, in which the probability of an individual being selected is inversely proportional to the size of its fitness function.

Step 5 :Crossover. It simulates chromosome crossover in the biological system, and the certain codes of the parents, like genes, are crossed over according to the crossover probability, and a new offspring is created after the crossover. The crossover method we adopted is to randomly generate genetic vectors to determine the crossover position.

Step 6 : Mutation. That is the mutation in biological community model. Coding genes are altered according to a given mutation probability.

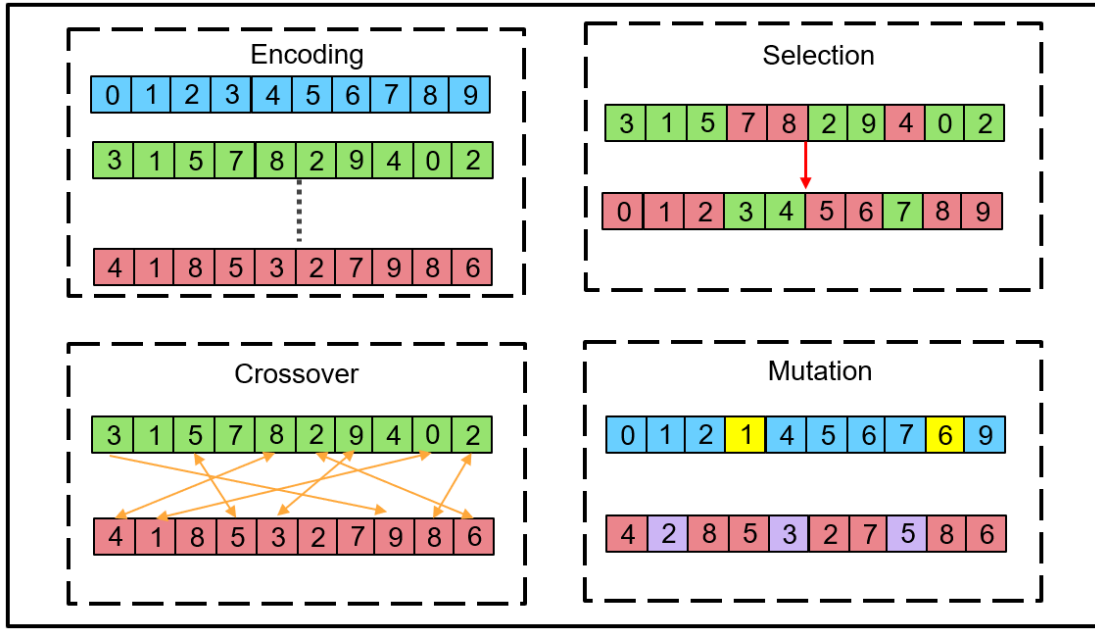

Figure S1. Steps in GA, including Coding, Selection, Crossover and Mutation

Step 7: Termination discriminations. Whether to terminate the iteration depends on the fitness of the offspring generated by crossover meets the requirements and reaching the maximum evolutionary algebra T. if terminated, the iteration with the smallest fitness is regarded as the output. Conversely, the process would be returned to Step 3.

After the calculation of GA algorithm, we can derive the points with smaller fitness functions in the initial definition domain. However, the GA algorithm is stochastic and has the possibility of falling into local optimal solutions. We repeat the GA algorithm 1,000,000 times and get 1,000,000 potential solutions. Furthermore, the boundary of the 1,000,000 potential solutions are considered as the more precise domain, and then, the optimal solution would be found by using IPPF algorithm:

#### S 1.2 IPPF

Interior point penalty function (IPPF) is appropriate to solve the problem of inequality constraints, and the calculated solution is within the feasible region. Hence, it would promise the final results in parameters domain calculated by GA, especially for Q. This method could adjust values of the input meteorological parameters to promote the optimal solution, including wind speed and wind direction.

Step 1 : Determine initial points ,  $x^{(0)} \in D_0$  ( $D_0$  is parameters domain) ; Penalty parameter sequence

$$\{\mu_k\}, \varepsilon > 0, k = 1.$$

Step 2 : Constructing auxiliary functions

$$F_{\mu_k}(x) = F(x) - \mu_k^{-1} \sum_{i \in I} \log g_i(x) \quad \text{ES2}$$

$$F = \sum_{i=1}^n (C_m^i - C_s^i)^2 \quad \text{ES3}$$

$g_i$  is inequality constraint.

$$lb < x_i < ub, i = 1, 2, 3, \dots, 10 \quad \text{ES4}$$

Step 3 :  $x^{(k-1)}$  is regarded as initial points, it was used to solving the unconstrained formula

$$\min F_{\mu_k}(x), x \in R^n$$

Step 4 : Termination discriminations, if

$$\mu_k^{-1} \sum_{i \in I} \log g_i(x) \leq \varepsilon \quad \text{ES5}$$

Then, the solution of  $x^{(k)}$  can be regarded as the output. Otherwise, return to step 2.

Finally,  $x^{(k)}$  is treated as the optimal solution of the unknow parameters, including emission rate, diffusion parameters and effectively emission height of CH<sub>4</sub> source.

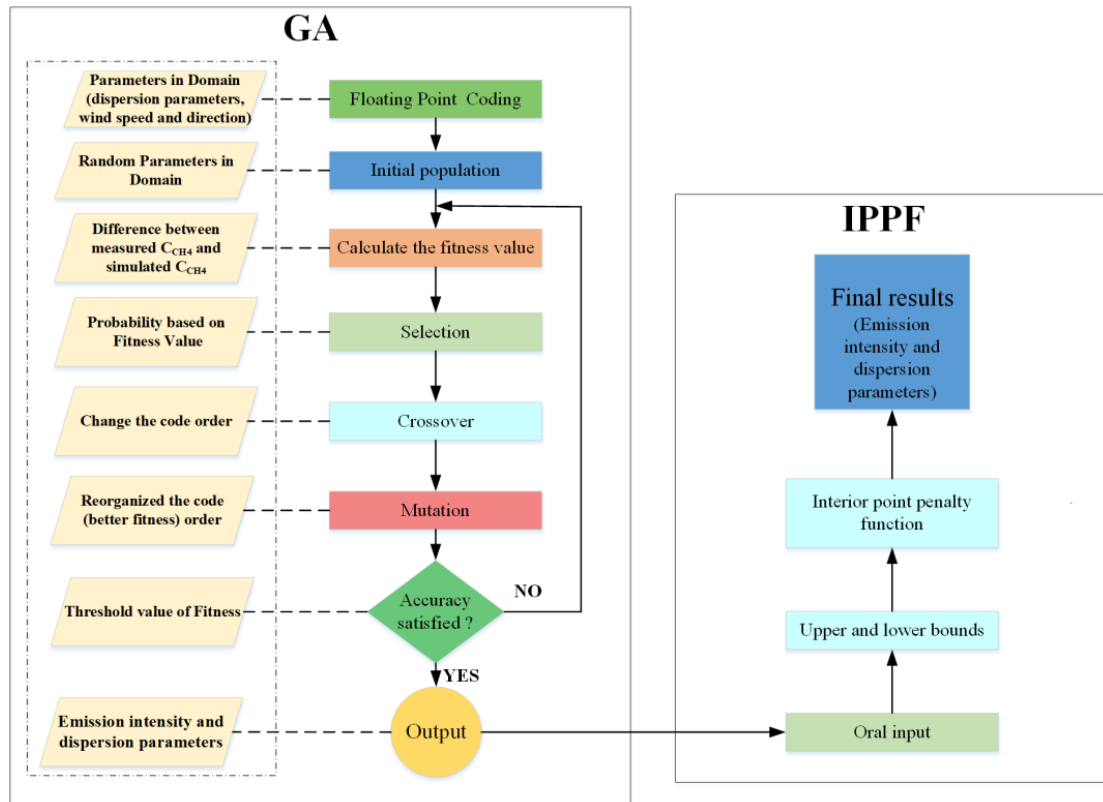

Figure S2. Detail processes of GA-IPPF
