# Supplementary material for: Retrieving coal mine CH 4 emissions using UAV-based AirCore observations and the GA-IPPF model
Source: Copernicus journal article supplement (doi:10.5194/acp-2022-180), 2022-06-07
Supplement: Supplementary file [file acp-2022-180-RC2-supplement.pdf]

# Retrieving CH<sub>4</sub> Emissions from Coal sampled with UAV-based Aircore system by using GA-IPPF model

Tianqi Shi<sup>1</sup>, Zeyu Han<sup>2</sup>, Ge Han<sup>3</sup>, Xin Ma<sup>1\*</sup>, Huilin Chen<sup>4,5\*</sup>, Truls Andersen<sup>5</sup>,  
Huiqin Mao<sup>6</sup>, Cuihong Chen<sup>6</sup>, Haowei Zhang<sup>1</sup>, Wei Gong<sup>1,7</sup>

<sup>1</sup> State Key Laboratory of Information Engineering in Surveying, Mapping and Remote Sensing, Wuhan University, Luoyu Road No.129, Wuhan 430079, China;

<sup>2</sup>School of Mathematics and Statistics, Wuhan University, Luoyu Road No.129, Wuhan 430079, China;

<sup>3</sup> School of Remote Sensing and Information Engineering, Wuhan University, Luoyu Road No.129, Wuhan 430079, China;

<sup>4</sup>Joint International Research Laboratory of Atmospheric and Earth System Sciences, School of Atmospheric Sciences, Nanjing University, Nanjing, China;

<sup>5</sup>Centre for Isotope Research, Energy and Sustainability Institute Groningen (ESRIG), University of Groningen, Groningen, Netherlands;

<sup>6</sup>Ministry of Ecology and Environment Center for Satellite Application on Ecology and Environment, Beijing, China;

<sup>7</sup> Electronic Information School, Wuhan University, Luoyu Road No.129, Wuhan 430079,China;

Correspondence to: Xin Ma([maxinwhu@whu.edu.cn](mailto:maxinwhu@whu.edu.cn)); Huilin Chen ([huilin.chen@rug.nl](mailto:huilin.chen@rug.nl))

## Abstract

Quantifying CH<sub>4</sub> emissions from coal mines has large uncertainty owing to the lack of effective monitoring methods. In this study, we developed a genetic algorithm–interior point penalty function (GA-IPPF) model to calculate the emission rate of large point sources of CH<sub>4</sub>. This model can provide the detailed optimized dispersion parameters and has self-calibration characteristics that reduce the accuracy requirements for auxiliary data. We evaluate the influence of different parameters on the retrieved CH<sub>4</sub>-emission rate by the GA-IPPF, including the uncertainty of CH<sub>4</sub> concentration measurements, number of CH<sub>4</sub> measurements, and meteorological data. Furthermore, based on the atmospheric CH<sub>4</sub> concentration measurements downwind of a Pniówek coal-mine ventilation shafts from a UAV-based AirCore system and the GA-IPPF model, we retrieve the CH<sub>4</sub>-emission rates from the Pniówek coal (Silesia coal mining region mine, Poland) ventilation shaft. Results show that the CH<sub>4</sub>-emission rates are variable even in a single day, ranging from 5.6±0.2 kt/year to 12.4±0.6 kt/year on August 18, 2017 and from 3.0±0.3 kt/year to 12.7±0.5 kt/year on August 21, 2017. The combination of the flexible UAV-based AirCore CH<sub>4</sub> measurements and the robust GA-IPPF model provides a effective means of quantifying CH<sub>4</sub> emissions from coal mines.

## 1.Introduction

The release of CH<sub>4</sub> into the atmosphere during coal mining is very concerning because it contributes to increased atmospheric concentration of CH<sub>4</sub>, one of the most important greenhouse gases and waste resources(Cardoso-Saldana and Allen 2020; Zhang et al. 2020). However, CH<sub>4</sub> emissions during coal mining are not always stable owing to collection or manufacturing processes, weather fluctuations, terrain effects(Nathan et al. 2015b). Bottom-up inventories could provide us with approximate information on CH<sub>4</sub>-emission rates from strong sources. However, inventories cannot serve as a standard for formulating policies to reduce anthropic CH<sub>4</sub> emission because of their low temporal resolution and uncertainty. The temporal resolution and accuracy of bottom-up inventory are too low to obtain emission

43 information instantaneously(Liu et al. 2020; Pan et al. 2021). Based on the measurements of CH<sub>4</sub>  
44 concentration around the emission source, developing a fast retrieval model to obtain emission intensity  
45 is an acceptable method. With the development of remote-sensing technologies, the CH<sub>4</sub> emission rate  
46 has become possible to quantify based on CH<sub>4</sub> concentration samples or measurement.

47 Greenhouse gases observing satellite and TROPOspheric Monitoring Instrument could obtain the  
48 column concentration of CH<sub>4</sub> (XCH<sub>4</sub>, ppb) with a spatial resolution of 10 km×10 km and 5 km×7.5 km.  
49 The regional CH<sub>4</sub> flux could be retrieved by assimilating the measured XCH<sub>4</sub> into an atmospheric  
50 dispersion model(Feng et al. 2016; Tu et al. 2022). PRISMA hyperspectral imaging satellite and GHGsat  
51 could detect increased CH<sub>4</sub> caused by strong emission sources with high spatial resolution, and the  
52 comprehensive CH<sub>4</sub> emission could be quantified by integrated mass enhancement or cross-sectional  
53 flux method(Guanter et al. 2021; Varon et al. 2020). However, CH<sub>4</sub> emission from coal is not constant  
54 even in a short time, and the spatial and temporal resolutions of satellites are not allowed to repeat the

55 quantification of CH<sub>4</sub> emission from coals in the same day(Schneising et al. 2020; Varon et al. 2019). An  
56 airborne platform could fly in low altitude to improve the acquisition of CH<sub>4</sub> concentration(Elder et al.  
57 2020; Wolff et al. 2021a) and estimate CH<sub>4</sub> emission from strong sources by cross-sectional flux method  
58 or Gaussian dispersion method. However, it has strict requirements for the flight track (downwind  
59 direction) and amount of measured CH<sub>4</sub> concentration data. Most ground-based sensors have the  
60 advantage to sample the concentration around the source continuously, but it could collect data only near  
61 the surface or could only measure column concentration(Caulton et al. 2017; Robertson et al. 2017; Zhou  
62 et al. 2021), which are insufficient to generate the distribution characteristic of the emission source.  
63 Ground-based different-absorption LIDAR could obtain the CH<sub>4</sub> profile concentration in different  
64 altitudes, which is suitable as the input of the emission-retrieval model(Shi et al. 2020a), but it has high  
65 requirements in terms of performance of hardware and system stability(Shi et al. 2020b). An unmanned  
66 aerial vehicle (UAV) could reach any location rapidly around the CH<sub>4</sub> sources, which could sample CH<sub>4</sub>  
67 concentration with location information(Iwaszenko et al. 2021; Nathan et al. 2015b), when equipped  
68 with an in-situ gas sensor. It could also acquire the characteristic of distribution with adequate data, which  
69 is beneficial to retrieving the emission rate.

70 Mass-balance method has been applied in determining CH<sub>4</sub> emissions based on UAV-based  
71 samples(Allen et al. 2018). Emission rates calculated by this method contain large uncertainty because  
72 the main kernel is Kriging interpolation(Nathan et al. 2015a), which causes obvious uncertainty in  
73 representing the actual feature of diffusion. The Gaussian dispersion model has also been applied in  
74 retrieving gas emission from strong sources(Shah et al. 2019)<sup>30</sup>, and is used to quantify CH<sub>4</sub> emission  
75 from a coal-mine ventilation shaft in this study. However, existing emission-retrieval models need priori  
76 information on diffusion parameters to retrieve the emission rate. Moreover, the accuracy of  
77 measurements of auxiliary meteorological data influences the result of CH<sub>4</sub>-emission calculation.  
78 Therefore, we develop herein a model to overcome these shortcomings. Our model could calculate the  
79 diffusion parameters without prior information and reduce the impact of meteorological data on the  
80 calculated CH<sub>4</sub>-emission rate.

81 In the present study, we collected CH<sub>4</sub> concentration <sup>data</sup> around a coal-mine ventilation shaft by using  
82 UAV-based active AirCore system with high accuracy(Andersen et al. 2018) for a total of seven Flights.  
83 Then, a CH<sub>4</sub> emission-retrieval model based on genetic algorithm (GA) combined with interior point-  
84 penalty function (IPPF) is presented. GA-IPPF could help us obtain detailed information on emission  
85 intensity and diffusion parameters. Finally, the performance of GA-IPPF model is compared with other  
86 quantification methods for CH<sub>4</sub> emission.

## 87 2.Data and methods

### 88 2.1.Active AirCore System

89 The active AirCore system comprises a ~50 m coiled stainless-steel tube that works in conjunction  
90 with a micropump and a small pinhole orifice (45  $\mu\text{m}$ ) to sample air along the trajectory of a drone. As  
91 long as the pressure downstream of the orifice is more than half of that of the upstream (ambient) pressure,  
92 a critical flow through the orifice is obtained. This finding means that the flow rate depends only on two  
93 variables, namely, the air temperature and the upstream (ambient) pressure, both of which are monitored  
94 during the flight. After obtaining the air sample, the sample is analyzed on a cavity ring down  
95 Spectrometer model G2401-m for CO<sub>2</sub>, CH<sub>4</sub>, and CO. For CH<sub>4</sub>, the accuracy of samples is  $\pm 0.02$  parts  
96 per million (ppm). The active AirCore system is controlled using an Arduino-built data logger, which  
97 records the temperature inside the carbon fiber housing. It also records the ambient temperature, ambient  
98 pressure, relative humidity, and pressure downstream of the pinhole orifice to ensure that critical flow is  
99 achieved. The datalogger also logs the GPS coordinates. The weight of the active AirCore system is ~1  
100 kg. The active AirCore system is attached to a DJI Inspire Pro 1, which is capable of providing flights of  
101 ~12 min.

### 102 2.2. Meteorological measurements

103 A radiosonde (Sparv Embedded AB, Sweden, model S1H2-R) measures ambient temperature, ambient  
104 pressure, ambient relative humidity, wind speed, and wind direction. The detection range of the  
105 temperature sensor is  $-40\text{ }^{\circ}\text{C}$  to  $+80\text{ }^{\circ}\text{C}$ , with an accuracy of  $0.3\text{ }^{\circ}\text{C}$ . The pressure sensor has a detection  
106 range of 300–1100 mbar, with an accuracy of 1 mbar. The relative humidity sensor measures a range of  
107 0%–100%, with an accuracy of approximately 2%. Owing to the good connection between the  
108 radiosonde and satellites, we assume that the uncertainty in the wind direction is low. The wind speed  
109 can be estimated within a range of 0–150 m/s, with an uncertainty of approximately 5%. If the wind-  
110 speed reading is less than 4 m/s, a minimum uncertainty of 0.2 m/s is given. The radiosonde is lifted by  
111 a ~30 L helium-filled balloon and is tethered onto a fishing line for easier retrieval after making a vertical  
112 profile.

### 113 2.3 Emission retrieve model

#### 114 2.3.1.Gaussian dispersion model

115 The Gaussian dispersion model is used to analyze the CH<sub>4</sub> fugitive from the coal mine in this work.  
116 The location of emission source is regarded as the coordinate origin; X-axis is the direction of the  
117 downwind, Y-axis is cross-wind direction, and Z-axis is the altitude above the ground. Based on the  
118 established coordinate system, the Gaussian plume could be modeled by Equation 1:

$$119 C(x, y, z) = \frac{q}{2\pi u \sigma_y \sigma_z} \exp\left(\frac{-(y)^2}{2\sigma_y^2}\right) \left\{ \exp\left(\frac{-(z-H)^2}{2\sigma_z^2}\right) + \alpha \cdot \exp\left(\frac{-(z+H)^2}{2\sigma_z^2}\right) \right\} + B \quad (1)$$

$$120 \sigma_y = a \cdot x^b \quad (2)$$

$$121 \sigma_z = c \cdot x^d \quad \text{methane is being emitted not coal} \quad (3)$$

122 C is the concentration ( $\text{g}/\text{m}^3$ ), q ( $\text{g}/\text{s}$ ) is the emission rate of coal from stack, u is the mean wind speed  
123 around the stack (m/s), H is the effective stack height,  $\sigma_y$  is the dispersion coefficient in the horizontal  
124 direction,  $\sigma_z$  is the dispersion coefficient in the vertical direction, u is the wind speed (m/s), and B is the  
125 background concentration of CH<sub>4</sub>. Moreover,  $\alpha$  is the reflection index of this phenomenon; and x, y, and  
126 z are the positions of the samples in the determined coordinate system.

#### 127 2.3.2.GA-IPPF model.

128 First, the genetic algorithm (GA) kernel calculates Q and other dispersion parameters as first guess(Liu

129 and Michalski 2016). It guarantees the retrieved unknown parameters through the global optimum  
 130 solution, including Q and diffusion parameters, as shown in Figure1. Then, the results calculated by GA  
 131 serve as **oral input parameters** and constraints in the IPPF model, and actual values of the concerned  
 132 parameters are retrieved by IPPF.

133 Based on the Gaussian dispersion model, auxiliary meteorological data, location information, and CH<sub>4</sub>  
 134 samples, we determine the unknown parameters in equations 1 to 3 by using GA, including q, H, a, b, c,  
 135 d, and  $\alpha$ . First, the locations and concentration of CH<sub>4</sub> samples and wind serve as an initial input of  
 136 equation 1. Then, the fitness value evaluates the applicability of the calculated parameters in each step.  
 137 We define the fitness value as

$$138 \quad F = \sum_{i=1}^n (C_m^i - C_s^i)^2 \quad (4)$$

$$139 \quad C_s^i(x, y, z) = \sum_{i=1}^n \frac{q'}{2\pi u' \sigma_y' \sigma_z'} \exp\left(-\frac{(y)^2}{(\sigma_y')^2}\right) \left\{ \exp\left(-\frac{(z-H')^2}{(\sigma_z')^2}\right) + \alpha' \cdot \exp\left(-\frac{(z+H')^2}{(\sigma_z')^2}\right) \right\} + B' \quad (5)$$

140 F is the fitness value;  $C_m^i$  is the sample CH<sub>4</sub> concentration; i is the number of samples;  $C_s^i$  is the  
 141 simulated concentration of CH<sub>4</sub> in the location of samples calculated by formula 5; and  $q'$ ,  $u'$ ,  $\sigma_y'$ ,  $\sigma_z'$ ,  $H'$ ,  
 142  $\alpha'$ , and  $B'$  are the calculated CH<sub>4</sub>-emission rate, wind speed, diffusion parameters, emission height, reflect  
 143 index, and background CH<sub>4</sub> concentration, respectively, acquired from the “Mutation” in Figure1. When  
 144 f is less than the threshold value ( $1 \times 10^{-5}$ ) of the fitness value, the corresponding parameters are treated  
 145 as the results of output.

146 IPPF rebuilds the inequality constraint conditions to the unconstrained solution process. It forces the  
 147 start point to satisfy the constraints, as shown in formula 6.

$$148 \quad \min F(x, r_k) = f(x) + r_k B(x) \quad (6)$$

149  $f(x)$  is the unconstrained equation, and  $r_k$  is the coefficient of the constrained equation  $B(x)$ . When the  
 150 solution parameters are out of the constraints,  $r_k B(x)$  is large, thereby ensuring that the final solution is  
 151 feasible under the inequality constraint conditions.

152 To obtain the inequality constraints, GA is repeated 1000000 times, and the mean values of the  
 153 calculated wind speed, wind direction, H, a, b, c, d, and  $\alpha$  are treated as the oral input of IPPF model.  
 154 The domains of H, a, b, c, d, and  $\alpha$  are determined by two times the standard deviation of the  
 155 corresponding results in GA. The constraint values of wind speed and direction are set according to the  
 156 precision of actual measurements,  $m \pm \sigma$ , whereas m is the measured value of wind speed or wind direction,  
 157 and  $\sigma$  is their precision. Actual B values are considered to range within 1800–2500 ppb. Then, the Pearson  
 158 correlation coefficient (R) values of the actual samples and simulated one work as judgment in the  
 159 solution process of formula 7.

$$160 \quad R = \frac{\sum_{i=1}^n (C_s^i - \bar{C}_s)(C_m^i - \bar{C}_m)}{\sqrt{\sum_{i=1}^n (C_s^i - \bar{C}_s)^2} \sqrt{\sum_{i=1}^n (C_m^i - \bar{C}_m)^2}} \quad (7)$$

161 The results are treated as the final retrieved values of the concerned parameters when the R reaches  
 162 the maximum. We use the “fmincon (interior point)” toolbox in MATLAB 2020a to implement the IPPF  
 163 model.

164

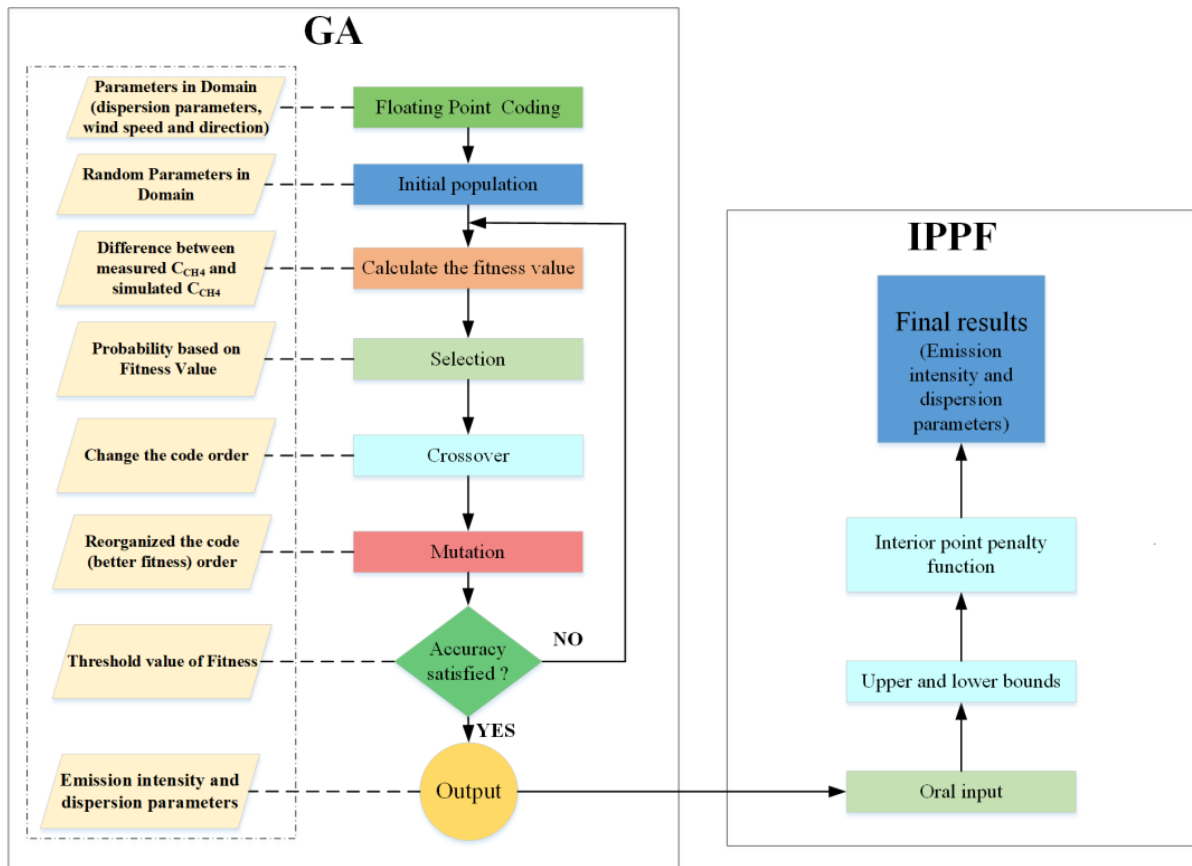

165

166

**Figure1.** Flow chart of Genetic Algorithm and IPPF model.

167 *This section needs to go before the model section as the location is mentioned. You should also make it clear what type of source this is as*  
 168 *2.4. Measurement Site*  
 169 *this will make a big difference to the model. Is a large open coal pit, or emission from a deep mine shaft or vent, or is it a combination of both.*

168 The Pniówek coal mine (49.975° N, 18.735° E) is a large mine in south Poland in Pniówek, Silesian  
 169 Voivodeship, which is 190 km southwest of the capital Warsaw, see Figure2. It has a large coal reserve  
 170 estimated to be about 101.3 million tons. Its coal production is about 5.16 million tons per year.

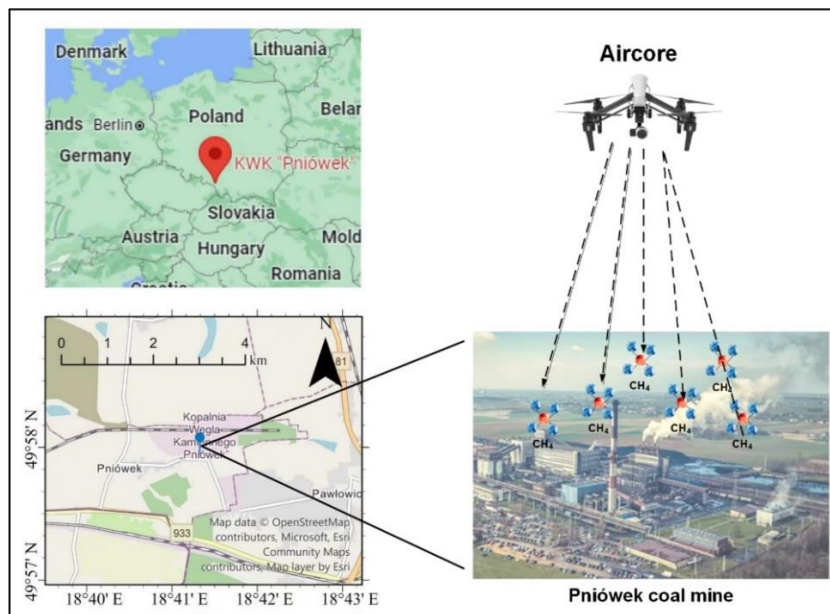

171

172

**Figure2.** The Pniówek coal mine

173

**3. Results**

*Caption needs more explanation. What actually is the zoomed map showing? Where is the mine? Is pink the mine buildings? Is it deep mine with shaft or open pit?*

174 3.1. Validation of performance of GA-IPPF model through simulations

175 First, the dispersion of CH<sub>4</sub> emission from **a coal** is simulated by equation 1, and the dispersion  
 176 parameters are shown in Table 1. To make the simulations close to the actual measurement scenarios,  
 177 random errors are added to the CH<sub>4</sub> concentration samples (5%), wind speed ( $\pm 0.3$  m/s), and wind  
 178 direction ( $\pm 20^\circ$ ). The spatial resolution of the supposed samples is 10 m, and 70 samples are selected  
 179 from the simulated dispersion to represent the data acquired by the UAV-based AirCore. Then, the  
 180 concerned parameters are retrieved by the GA-IPPF method. The input parameters include hypothetical  
 181 wind speed, wind direction, and 70 samples, as shown in Figure3. Simulations are repeated 10 000 times,  
 182 and the average values of the corresponding parameters are treated as the “Retrieved” results in Table 1.

Showing simulated data without showing any real 3-D data from the AirCore. What does this look like? What are you trying to simulate?

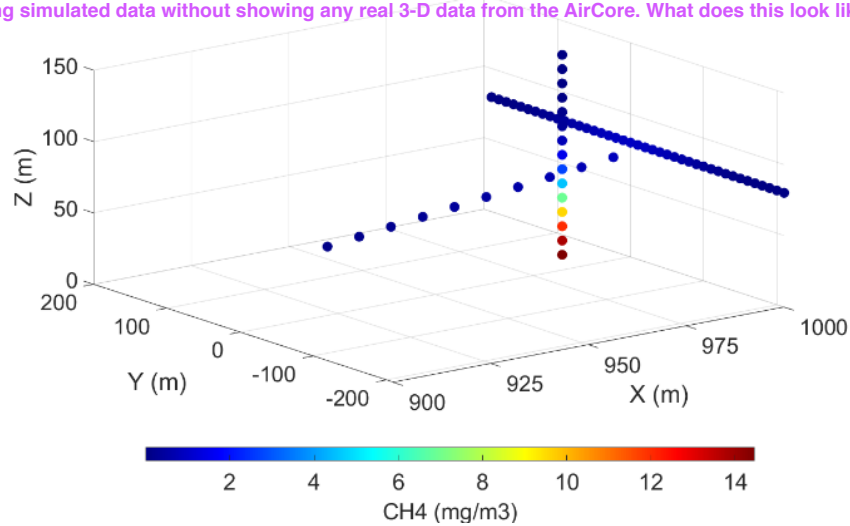

183  
184  
185

**Figure3.** The determined 70 CH<sub>4</sub> samples in simulations

Table 1. Set parameters in dispersion simulation and the retrieved results

| Parameters               | Actual | Retrieved  |
|--------------------------|--------|------------|
| Emission intensity (g/s) | 300    | 300.5±0.01 |
| Wind speed (m/s)         | 3      | 3±0.01     |
| Wind direction (°)       | 90     | 90±0.01    |
| a                        | 0.11   | 0.13±0.02  |
| B                        | 0.9    | 0.9±0.02   |
| c                        | 0.1    | 0.12±0.01  |
| d                        | 0.82   | 0.8±0.01   |
| B (ppb)                  | 1900   | 1900±3     |
| Emission height (m)      | 20     | 19.7±1.2   |
| $\alpha$                 | 0.9    | 0.89±0.03  |

186 “Actual” means the set values of parameters, and “Retrieved” means the average values of parameters  
 187 retrieved by GA-IPPF model through 10 000 times of simulation.

188 **As shown in Table 1, q retrieved by GA-IPPF has only 0.17% bias compared with the set values.**

189 Emission height only has 0.3 m bias to set one, and uncertainty is only 0.6% to 20 m. Other retrieved  
 190 parameters also show high consistency with the original settings.

191 3.2. Stability analyses

192 The necessary input parameters in GA-IPPF contain meteorological data (wind speed and direction),  
 193 accuracy of CH<sub>4</sub> samples, and amount of CH<sub>4</sub> samples. In formula 1, wind speed nearly has a linear  
 194 relationship with the emission estimation. Wind speed is also an important factor that determines

195 atmospheric stability according to the Pasquill–Gifford method(Venkatram 1996) as it affects the  
 196 diffusion parameters of  $\sigma_y$  and  $\sigma_z$ . The coordinate is built according to the wind direction, **which is defined**  
 197 **the plane coordinates of CH<sub>4</sub> samples**. According to formulas 2 to 3, errors in wind-direction  
 198 measurement lead to wrong  $\sigma_y$  and  $\sigma_z$  on each position of samples. CH<sub>4</sub> samples are the most important  
 199 factors to determine the Gaussian diffusion. The accuracy of samples influences the judgment of “fitness”  
 200 in the GA process. More samples collected in different positions help rebuild the spatial-distribution  
 201 characteristics of the plume because it provides larger possibility for fitting process in IPPF and helps  
 202 determine the optimum solution. To evaluate the influence of errors in the measurements of necessary  
 203 parameters on the final retrieved results, the same settings in Table 1 are used as actual results. The  
 204 performance of the GA-IPPF model with additional random errors in each parameter are simulated  
 205 10 000 times, as shown in Figure4.

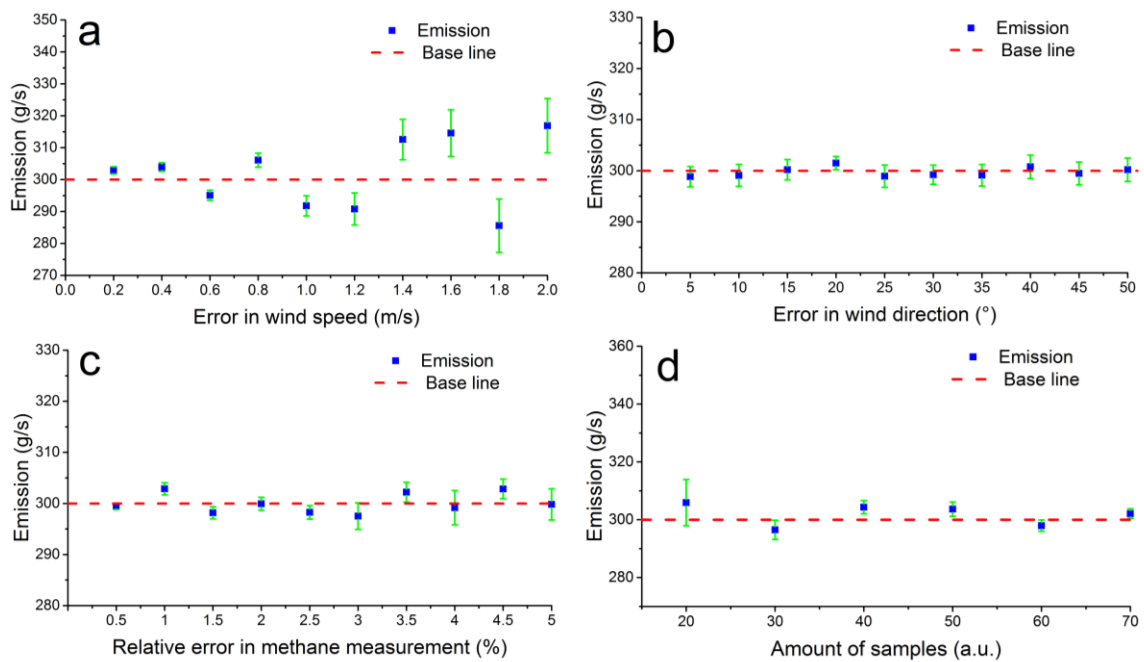

206  
 207 **Figure4.** Influence of accuracy of parameters on final results. Baseline represents the set emission rate  
 208 of CH<sub>4</sub>, 300 g/s: (a) wind speed, with additional error ranging within 0.2–2 m/s and an interval of 0.1  
 209 m/s, (b) wind direction, with additional error ranging within 5°–40° and an interval of 5 °, (c) accuracy  
 210 of CH<sub>4</sub> samples, with additional error ranging within 0.5%–5.0% and an interval of 0.5%, and (d) amount  
 211 of CH<sub>4</sub> samples, randomly selected as 20–70 among the defined 70 samples.

212 In Figure 4 (a), the mean value of  $q$  retrieved by GA-IPPF has nearly the same with the baseline if the  
 213 error in wind speed is less than 0.4 m/s and the maximum bias to the baseline is 16.3 g/s. Fluctuation of  
 214  $q$  occurs obviously if error in wind speed exceeds 0.4 m/s. The standard errors of  $q$  are positively  
 215 correlated with the values of errors in wind speed, indicating that the accuracy of wind-speed  
 216 measurements largely influences the stability of the GA-IPPF model. This model has a self-adjustment  
 217 function for wind speed; for example, when the oral wind speed is 3 m/s, the maximum standard error of  
 218  $q$  is only 8.5 g/s (3.5% to the 300 g/s) when the additional error of wind is 2 m/s (66.7% to 3 m/s).

219 The retrieved  $q$  shows less sensitivity on errors in wind direction, see Figure4(b). When errors in the  
 220 wind direction are 5° to 40°, all biases of  $q$  are within 1.1 g/s and the standard errors are around 2.3 g/s.  
 221 Wind direction determines the spatial location of the sampling point, and **wrong location information**  
 222 **leads to distinct errors in emission estimation**. GA-IPPF shows highly accurate ability in wind direction

This implies that there could be big errors in  $q$  if the source is not a point source, but unequally distributed over an area, which could be the case with a farm or landfill site emission.

223 to obtain the global optimum solution.

224 Sampling accuracy has small impact on the retrieved  $q$  within different settings in  $\text{CH}_4$  samples' accuracy, see Figure4(c). Standard deviation is positively correlated with errors in  $\text{CH}_4$  measurements.

225 accuracy, see Figure4(c). Standard deviation is positively correlated with errors in  $\text{CH}_4$  measurements.  
226 The standard deviation is 3.1 g/s when the measurement error reaches 5%. Notably, the uncertainty of  
227  $\text{CH}_4$  samples measured by UAV-based AirCore system is far less than 5%. The AirCore system could

228 acquire more than 70  $\text{CH}_4$  samples in actual feasible measurements, thereby guaranteeing the accuracy  
229 of the retrieved  $\text{CH}_4$  emission by coal to exceed 99.2%. Not clear what this means. Number of air Core samples that can be collected  
230 and analysed within a given time period within the same source emission plume

231 The number of measurement points obviously influences the final accuracy of  $q$  by the GA-IPPF model,  
232 see Figure4(d). It has 5.9 g/s bias to 300 g/s when  $n$  is 20. The accuracy of  $q$  and the standard error are  
233 negatively correlated with  $n$ , which provides the number of judging criteria for the fitting process in the  
234 retrieval model. Hence,  $n$  directly influences the retrieved results. The AirCore system has the advantage  
235 of continuous sampling during flight, which integrates the atmospheric signals along the flight path and  
236 helps reduce the uncertainty of the retrieved  $q$ . On the other hand, the smoothing of the atmospheric  
237 signal also reduces the spatial resolution of the measurements, which needs to be considered during the  
238 optimization<sup>30</sup>.

239 IPPF can suitably solve the problem of inequality constraints, and the calculated solution guarantees  
240 the calculated parameters to be within the feasible region. In this section, GA-IPPF model performance  
241 and its adjustments on the concerned four input parameters were discussed.

### 241 3.3. Actual experiments

242 Fifteen active AirCore flights around Pniówek coal mine are collected successfully on August 18, 2017  
243 and August 21, 2017. The sample data in Flight 8 (18/8/2017) and Flight 15 (21/8/2017) are used to  
244 evaluate the GA-IPPF model, as shown in Figure5.

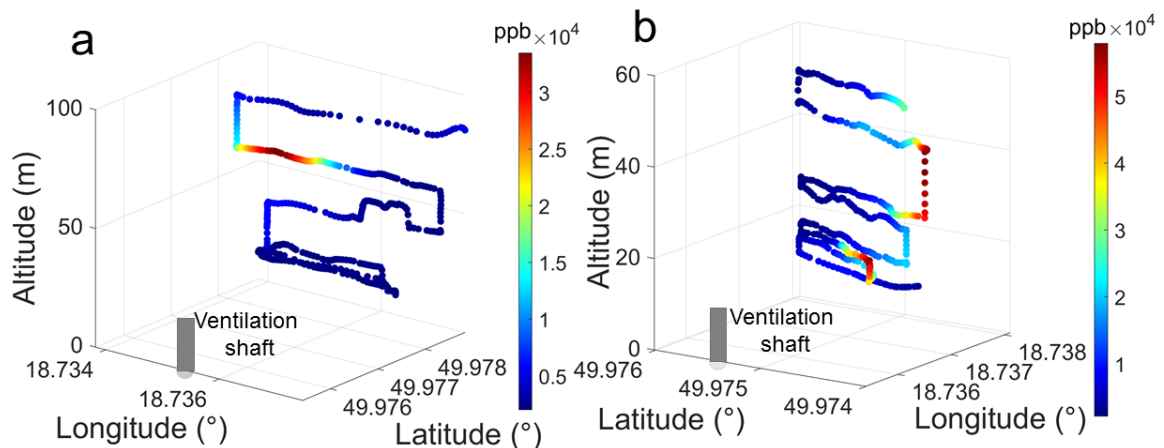

245 **Figure5.** Samples of  $\text{CH}_4$  in two Flights: (a) Flight 6 and (b) Flight 15.  
246

247 In Flight 5, the AirCore system collects  $\text{CH}_4$  around the coal spirally from 0 m to 98 m, for a total of  
248 376 samples, and the measurement period is 7 min, ranging from 1980.1 ppb to 49 113.9 ppb. In Flight  
249 15, the AirCore system collects a total of 400 samples, and the measurement period is 9 min, ranging  
250 from 2131.7 ppb to 57 265.3 ppb. Both Flights show high spatial variability in  $\text{CH}_4$  exhaust from coal  
251 mine. Subsequently, we input the wind speed, wind direction, location information, and  $\text{CH}_4$  samples  
252 collected from Flights into the GA-IPPF model. To express the final retrieved emission ( $Q$ ) in g/s, the  
253 dry-air mixing ratio of  $\text{CH}_4$   $C$  (ppb) is transformed into mass concentration  $m$  ( $\text{g}/\text{m}^3$ ) as follows:

254 
$$m = C \cdot \frac{M_{\text{CH}_4}}{M_{\text{Air}}} \quad (8)$$

Surely an AirCore is one sample that has enough air to allow 400 measurements when attached to the Picarro?



255  $M_{CH_4}$  is the molar mass of  $CH_4$ ,  $M_{air}$  is the molar mass of air.

256 The retrieved results are shown in Table 2. Notably, the emission height in Flight 15 is larger than that  
257 of Flight 6, which may be caused by the difference in thermal energy and vertical wind speed of the two  
258 flights. The background concentrations of  $CH_4$  are 2001.3 and 2002.1 ppb in Flights 6 and 15,  
259 respectively, which show little difference. The dates of the two Flights are very close, so the background  
260 concentration of  $CH_4$  in two days have nearly the same seasonal characteristic. The exhaust gases of coal  
261 mine are emitted through the stack with effective emission heights of 5.7 and 3.64 m, respectively.

262 To evaluate the rationality of the retrieved results, these parameters are used to simulate  $CH_4$  diffusion  
263 from the Pniówek coal mine according to equation 1. The comparison between simulated  $CH_4$   
264 concentration and actual samples in the same locations is shown in Figure6.

265 Table 2. Results calculated by GA-IPFF model

| Parameters                   | Flight 6 | Flight 15 |
|------------------------------|----------|-----------|
| Oral wind speed (m/s)        | 4.5      | 4.1       |
| Oral wind direction (°)      | 310      | 125.4     |
| Emission intensity (kt/year) | 6.1±0.3  | 8.4±0.5   |
| Wind speed (m/s)             | 3.25     | 3.20      |
| Wind direction (°)           | 349.6°   | 128.1     |
| a                            | 0.22     | 0.31      |
| b                            | 0.90     | 0.90      |
| c                            | 0.006    | 1.50      |
| d                            | 1.29     | 0.38      |
| B (mg/m <sup>3</sup> )       | 1.55     | 1.57      |
| Emission height (m)          | 59.3     | 36.3      |
| Reflection index             | 0.85     | 1.0       |

266 Then, we also calculated the difference between the actual measured points and simulated ones as

267 
$$D_c = C_s - C_m \quad (9)$$

268  $D_c$  is the difference of  $CH_4$  concentration between actual measured and simulated ones.  $C_s$  is simulated  
269  $CH_4$  concentration (mg/m<sup>3</sup>),  $C_m$  is simulated  $CH_4$  concentration (mg/m<sup>3</sup>).

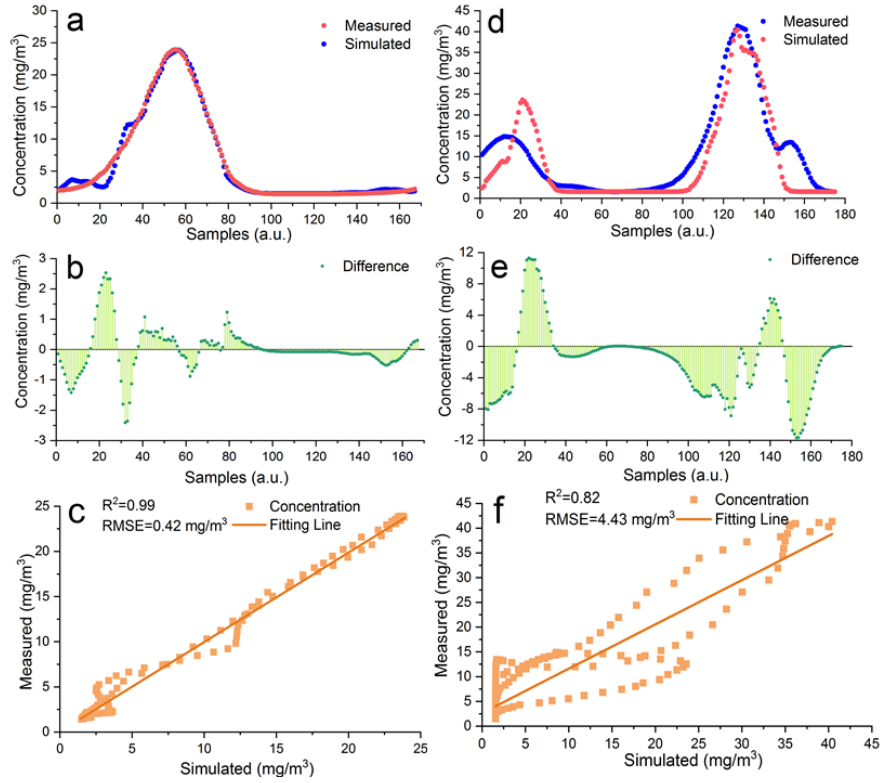

270

271 **Figure6.** Comparison between the measured samples and the simulated ones based on the parameters in  
 272 Table 1: (a). Flight 6 and (d) Flight 15. The difference of simulated CH<sub>4</sub> concentration and actual  
 273 measured ones:(b) Flight 6 and (e)Flight 15. Correlation Analysis: (c) Flight 6 and (f)Flight 15.

274 As shown in Figure6(a), the tendency of the simulated concentration data is consistent with the  
 275 measured ones in Flight 6. The largest value (NO.55) of the measured CH<sub>4</sub> concentration is 23.9 mg/m<sup>3</sup>,  
 276 whereas simulated one is 23.8 mg/m<sup>3</sup> on same location, only 0.42% bias. Dc is ranging from -2.4 to 2.3  
 277 mg/m<sup>3</sup> in Flight 6 (see Figure6(b)), this little bias indicates the simulated result is reasonable. The R<sup>2</sup>  
 278 of the measured samples and simulated ones is 0.99, root mean square error (RMSE) is 0.42 mg/m<sup>3</sup>.It  
 279 indicates the GA-IPPF model could correctly rebuild the diffusion of CH<sub>4</sub> in Flight 6. Figure6(d) shows  
 280 a slight difference between the two items in the first peak and third peak. Since the GA-IPPF method  
 281 would adjust more weights to the samples with higher concentration (NO.100 to 150 in Flight 15) to get  
 282 the global optimal solution of the relevant parameters, this would lead to the low fitness of the first peak  
 283 in Figure6(e). In general, the tendency of the simulated ones remains consistent with that of the actual  
 284 samples in Flight 15, especially for the points in the second peak. R<sup>2</sup> and RMSE of the measured samples  
 285 and simulated ones in Flight 15 also show the high applicability of the retrieved parameters.

### 286 3.4. Uncertainty Analyses

287 The uncertainties in CH<sub>4</sub>-emission estimations are derived from the measurements of meteorological  
 288 data and CH<sub>4</sub> samples in the discussed Flights. As shown in Figure3, n is the largest source that  
 289 contributes to the uncertainty in emission calculation, and the accuracy of AirCore samples, wind speed,  
 290 and wind direction should also be of concern. Therefore, the total uncertainty in actual CH<sub>4</sub> emission  
 291 retrieved could be calculated as

$$\varepsilon_t = \sqrt{\varepsilon_n^2 + \varepsilon_m^2 + \varepsilon_w^2 + \varepsilon_d^2} \quad (10)$$

292 Where  $\varepsilon_t$  is the total uncertainty of Q estimation. In this section,  $\varepsilon_n$ ,  $\varepsilon_m$ ,  $\varepsilon_w$ , and  $\varepsilon_d$  are the uncertainty  
 293 caused by n, accuracy of CH<sub>4</sub> samples, wind speed, and wind direction, respectively. Results in Figure3

294 are used to determine the values of  $\varepsilon_n$ ,  $\varepsilon_m$ ,  $\varepsilon_w$ , and  $\varepsilon_d$  in each Flight.

## 295 **4. Discussion**

### 296 *4.1. Comparison with other methods*

297 To investigate the difference between our recommended emission model and others, three methods  
298 have been applied to estimate CH<sub>4</sub> emission in all Flights, including mass-balance approach, nonlinear  
299 least square fit (NLSF), and facility emission.

300 Mass-balance approach quantifies CH<sub>4</sub> emission by calculating the cross-sectional flux perpendicular to  
301 the wind direction (Krings et al. 2018). First, a two-dimensional plane is selected according to the **amount**  
302 **of CH<sub>4</sub> samples**. Second, the two-dimensional plane is divided into a grid of equal spatial resolution.  
303 Third, CH<sub>4</sub> samples are regarded as origin points to interpolate full grids defined by the Kriging  
304 interpolation scheme (Mays et al. 2009). Finally, the emission rate of the CH<sub>4</sub> source is calculated by

$$305 \quad F_{(CH_4)} = \iint v \sin(\alpha) \cdot (C_{(x,z)} - C_{bg}) dx dz \quad (11)$$

306 Where  $v$  is the wind speed,  $\alpha$  is the angle between wind direction and the two-dimensional plane,  $C_{(x,z)}$   
307 is the density of CH<sub>4</sub> in each grid, and  $C_{bg}$  is the background of CH<sub>4</sub> in each grid. The uncertainty analyses  
308 of this method are detailed in Nathan et al. (Nathan et al. 2015a).

309 NLSF and the combination of NLSF with Gaussian diffusion model are also extensively used for point-  
310 source emission retrieval (Wolff et al. 2021b; Zheng et al. 2020). In this study, NLSF is used to estimate  
311  $Q$  in each Flight by fitting the unknown parameters in equation 1, and the uncertainty of the retrieved  $Q$   
312 is evaluated with formula 6.

313 Missing date Andersen et al. also developed an inverse Gaussian approach to quantifying CH<sub>4</sub> emissions from coal  
314 mine based on the same Flights (Andersen et al. 2021). First, the Gaussian dispersion is built as

$$C(x, y, z) = \frac{q}{2\pi u \sigma_y \sigma_z \cos(\theta)} \exp\left(\frac{-(y)^2}{2\sigma_y^2}\right) \left\{ \exp\left(\frac{-(z-H)^2}{2\sigma_z^2}\right) + \alpha \cdot \exp\left(\frac{-(z+H)^2}{2\sigma_z^2}\right) \right\} \quad (12)$$

315 Where  $\theta$  is the angle between the wind direction and the perpendicular line of the flight trajectory. This  
316 model does not contain the item of background of CH<sub>4</sub>. Furthermore,  $\sigma_y$  and  $\sigma_z$  are treated as certain  
317 values in equation 8. Then,  $q$  and the related parameters are retrieved by “fmincon optimizer” in  
318 MATLAB (detailed settings are found in Andersen et al.). The CH<sub>4</sub> emissions in each Flight, as evaluated  
319 by Andersen et al., are presented in this section.

320 Facility-emission data and hourly CH<sub>4</sub> emission from shaft are calculated by measuring raw CH<sub>4</sub>  
321 concentration and air flux through the shafts. The CH<sub>4</sub> emission rates estimated using hourly facility-  
322 emission data for 21 August 2017 and 21 August 2017 are  $14.4 \pm 4.9$  and  $8.2 \pm 2.9$  kt/year, respectively,  
323 as shown in Figure 7.

Why is the inventory emission lower for flight 8? Seems to be consistent across the second day.

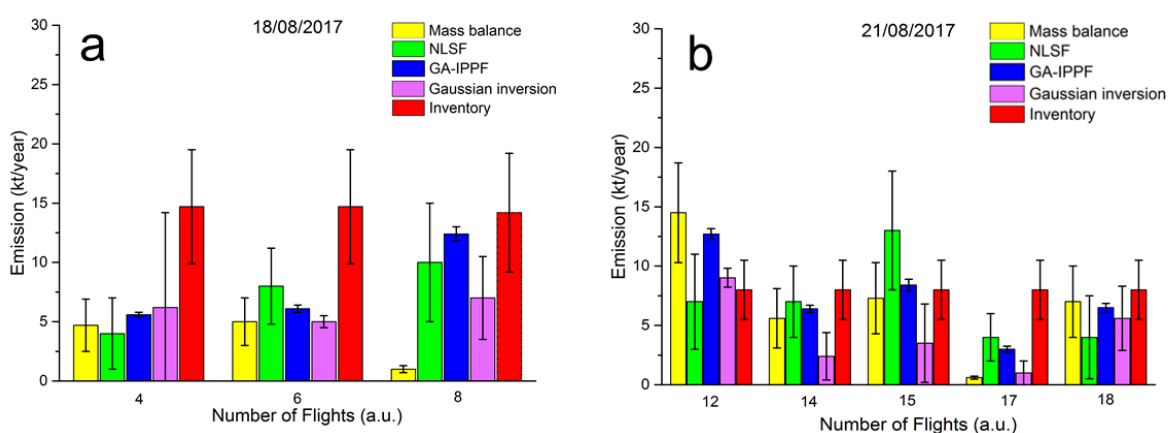

324

325 **Figure7.** Quantified CH<sub>4</sub> emission by different methods based on the collected data: (a) August 18, 2017  
 326 and (b) August 21, 2017. The results of CH<sub>4</sub> emission rate calculated by Mass balance and Inverse  
 327 Gaussian refer to [Andersen et al<sup>30</sup>](#). Why does this reference have no date and a number next to it (wrong style)

328 As shown in Figure7, Flights 4, 6, and 8 are measured on 18 August 2017, whereas Flights 12, 14, 15,  
 329 17, and 18 are measured on 21 August 2017. Figure7(a) shows that the CH<sub>4</sub>-emission rates calculated by  
 330 mass balance are smaller than the inventory estimation in all Flights. In Flight 8, q retrieved by mass  
 331 balance is extremely lower than those quantified by other methods, whereas q retrieved by GA-IPPF  
 332 model (12.4±0.6 kt/year) shows only a slight difference from the inventory. As shown in Figure 7(b),  
 333 CH<sub>4</sub> emissions retrieved by mass balance, inverse Gaussian, and GA-IPPF model are overestimated  
 334 compared with the inventory in Flight 12. Mass balance and inverse Gaussian method also show  
 335 obviously underestimated q in Flight 17. Estimations of retrieved CH<sub>4</sub> emission in Flight 18 show  
 336 consistency among methods of mass balance, GA-IPPF, and inverse Gaussian. The CH<sub>4</sub>-emission rate of  
 337 coal generally has significant variability in each measurement, even on the same day. Mass balance is  
 338 very sensitive to the size settings of grids, and different height and length settings can affect the  
 339 concentration distribution across the cross-section. NLSF has a high-accuracy requirement for wind  
 340 measurements, and errors on these measurements have a linear influence on the final emission estimation.  
 341 Notably, the standard errors of q quantified by GA-IPPF always are the least among these methods,  
 342 indicating the stability of our developed model.

#### 343 4.2 Application of Reanalysis meteorological database in GA-IPPF model

344 Wind speed and wind direction acquired by the radiosonde or weather station are two main parameters  
 345 in GA-IPPF. However, additional sensors are bound to increase the cost and difficulty during actual CH<sub>4</sub>-  
 346 emission measurements. To explore the possibility of weather reanalysis data instead of actual wind  
 347 measurement by sensors, we use 10 m U and V wind components from the ERA5 meteorological  
 348 reanalysis database (spatial resolution is 0.1°×0.1°, and temporal resolution is 1 h) developed by the  
 349 European Centre for Medium-range Weather Forecast(Hersbach et al. 2020) to evaluate GA-IPPF model.  
 350 However, the wind directions from ERA obviously differ from the actual measurements during the  
 351 Flights. Hence, we determine the wind direction by using the CH<sub>4</sub> samples, for example, the line between  
 352 the shaft and the location of the maximum value of samples in the same heights is treated as the  
 353 downwind direction, whose uncertainty is set as 50°. Wind speed from ERA is used for the CH<sub>4</sub>-emission  
 354 calculation, uncertainty is supposed as 2 m/s. Even oral wind speed and direction obviously differ  
 355 between the two sources; however, the GA-IPPF model adjusts them into reasonable ranges. The results  
 356 of q during all Flights retrieved by two meteorological data sources have been evaluated, as shown in

357 Table 3.

358

Table 3. Retrieved CH<sub>4</sub> emission by ERA meteorological data

| Flights | Actual   | ERA      |
|---------|----------|----------|
| 4       | 5.6±0.2  | 6.0±0.3  |
| 6       | 6.1±0.3  | 6.4±0.5  |
| 8       | 12.4±0.6 | 14.4±0.9 |
| 12      | 12.7±0.5 | 13.2±0.7 |
| 14      | 6.4±0.3  | 5.0±0.4  |
| 15      | 8.4±0.5  | 7.8±0.5  |
| 17      | 3.0±0.3  | 3.4±0.5  |
| 18      | 6.5±0.4  | 7.0±0.5  |

359 Table 3 shows that the values of quantified q between two meteorological sources are within 20% in  
360 the same Flight. The standard errors of q retrieved by the ERA5 database are larger than those from actual  
361 measurements, which depends on the accuracy of the reanalysis of wind speed and wind direction. Thus,  
362 it reduces the necessity of additional equipment except for the AirCore system and the complexity of this  
363 program.

This is not a sentence

364 To explore the reason that the acceptable difference of calculated methane emission rate by the two  
365 sources of meteorological data. The concerned parameters in Flight 6 and Flight 15 calculated based on  
366 ERA5 meteorological data were presented in Table 4.

367

Table 4. Results calculated ERA5 meteorological data

| Parameters                   | Flight 6 | Flight 15 |
|------------------------------|----------|-----------|
| Oral wind speed (m/s)        | 2.6      | 4.1       |
| Oral wind direction (°)      | 300      | 120       |
| Emission intensity (kt/year) | 6.4±0.5  | 7.8±0.6   |
| Wind speed (m/s)             | 2.99     | 4.52      |
| Wind direction (°)           | 349.4°   | 128.1     |
| a                            | 0.28     | 0.18      |
| b                            | 0.90     | 0.93      |
| c                            | 0.01     | 0.13      |
| d                            | 1.26     | 0.84      |
| B (mg/m <sup>3</sup> )       | 1.56     | 1.57      |
| Emission height (m)          | 60.2     | 36.0      |
| Reflection index             | 0.80     | 0.71      |

368 The oral wind speed and wind direction in Table 4 are obviously different from those in Table 2.  
369 However, the calculated wind directions are nearly the same based on the two sources of meteorological  
370 data. Diffusion parameters and emission height in Table 8 also show less difference in two Tables (Table  
371 2 and Table 4). It is worth nothing that the wind speed and reflection index would be adjusted to reach  
372 the global solution by GA-IPPF model, which leads to little bias for the emission rate of CH<sub>4</sub> in Table 3.

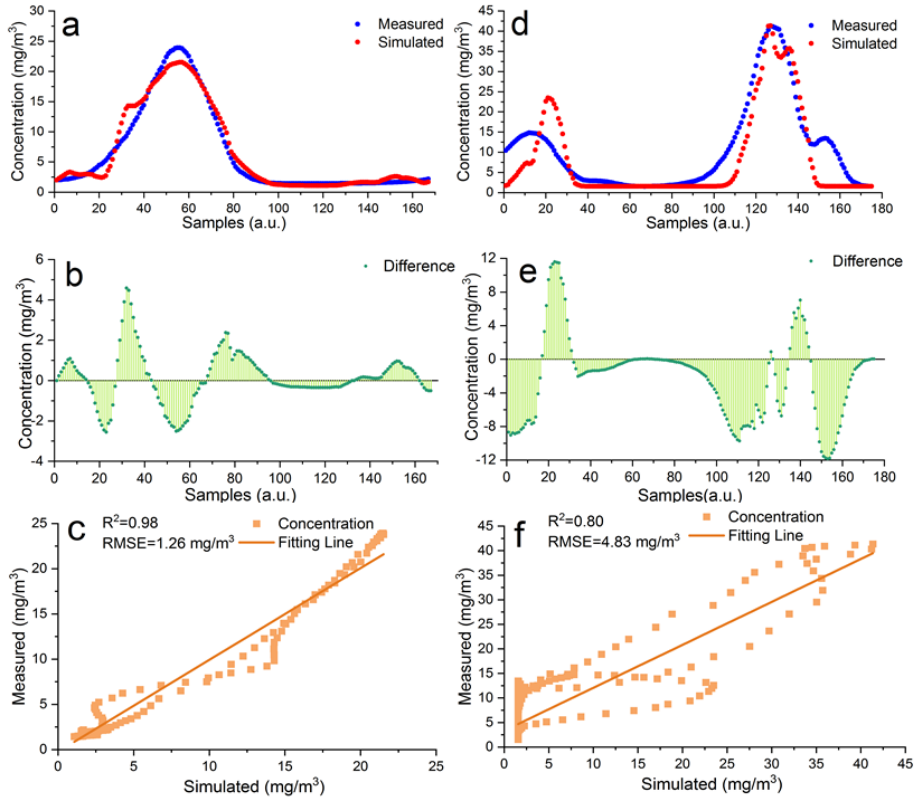

373

374 **Figure8.** Comparison between the measured samples and the simulated ones based on the ERA5  
 375 meteorological data: (a). Flight 6 and (d) Flight 15. The difference of simulated CH4 concentration and  
 376 actual measured ones:(b) Flight 6 and (e)Flight 15. Correlation Analysis: (c) Flight 6 and (f)Flight 15.

377 The simulated concentration of CH<sub>4</sub> in Flight 6 and Flight 15 calculated by parameters in Table  
 378 4 are shown in Fig.8. In Fig.8(a), the consistency between actual samples and simulated ones is  
 379 slight lower than that in Fig.6(a), D<sub>c</sub> is ranging from -2.4 to 4.3 mg/m<sup>3</sup>, which is an acceptable bias  
 380 as only 6 points exceed 2.3 mg/m<sup>3</sup>. R<sup>2</sup> (0.98) of measured samples and simulated ones is almost  
 381 same to that in Fig.6(c), while RMSE is nearly three times than that in Fig.6(c). In Fig.8(d), the  
 382 tendency of simulated CH<sub>4</sub> concentration is similar to Fig.6(d). D<sub>c</sub> is ranging from -11.9 to 11.6  
 383 mg/m<sup>3</sup>, which is nearly same as the result in Fig.6 (e), it worth nothing that D<sub>c</sub> simulated by ERA  
 384 meteorological data is slight larger on samples (NO.1 to 20) compared with that in Fig.6 (e). The R<sup>2</sup>  
 385 and RMSE in Fig. 8(f) indicate that the retrieved results using ERA data are less accurate than that  
 386 using actual measured meteorological data. In summary, though we set large uncertainties in ERA  
 387 meteorological data, GA-IPPF can still guarantee reasonable and adequate accuracy for the retrieved  
 388 emission rate and diffusion parameters.

### 389 5.Conclusion

390 CH<sub>4</sub> emissions from coal are inconsistent even with short time differences. They usually show a large  
 391 difference for different mining volumes and types. Enhancement in CH<sub>4</sub> by the emission source is much  
 392 larger than the background concentration, and the distribution of leak gas shows an obvious spatial  
 393 difference. Hence, the retrieval time needs to be shortened for each emission measurement. AirCore has  
 394 high portability and flexibility to measure CH<sub>4</sub> concentration around emission sources, accompanied by  
 395 the GA-IPPF model, which is acceptable to calculate CH<sub>4</sub> emission from coals or other point sources.  
 396 This program can help improve the accuracy of estimating CH<sub>4</sub> emission from coals, especially  
 397 developed countries that even lack no inventories of gas emission. It can also help governments evaluate

this is a double negative

398 the fugitive CH<sub>4</sub>-emission rate during mining and formulate policies to promote the innovation of mining  
399 equipment and technology. The recommended program is appropriate for quantifying local sources based  
400 on the advantage of hardware and retrieval model. The UAV-based AirCore system helps rebuild the  
401 diffusion of CH<sub>4</sub> with flexibility and high sampling rate. The GA model could restrict the calculated  
402 emission details within a reasonable range. Therefore, this program has great potential application in the  
403 point-source quantitation of other gases, such CO<sub>2</sub>, SO<sub>2</sub>, etc.

Should include a recommendation of how many Air  
Core retrievals from a single point source are  
required to minimise the errors on model results

#### 404 Acknowledgements

405 This work was supported by the National Natural Science Foundation of China (Grant No.41971283,  
406 41801261, 41827801, 41901274, 41801282, 42171464), the National Key Research and Development  
407 Program of China (2017YFC0212600), The Key Research and Development Project of Hubei Province  
408 (2021BCA216), the Open Research Fund of National Earth Observation Data  
409 Center(NODAOP2021005).

#### 410 References Need complete references, add journal volume numbers and pages / DOI where missing

411 Allen, G., Hollingsworth, P., Kabbabe, K., Pitt, J.R., Mead, M.I., Illingworth, S., Roberts, G., Bourn, M.,  
412 Shallcross, D.E., & Percival, C.J. (2018). The development and trial of an unmanned aerial system for  
413 the measurement of methane flux from landfill and greenhouse gas emission hotspots. *Waste*  
414 *Management*, S0956053X17309698

415 Andersen, T., Scheeren, B., Peters, W., & Chen, H.L. (2018). A UAV-based active AirCore system for  
416 measurements of greenhouse gases. *Atmospheric Measurement Techniques*, 11, 2683-2699

417 Andersen, T., Vinkovic, K., de Vries, M., Kers, B., Necki, J., Swolkien, J., Roiger, A., Peters, W., & Chen,  
418 H. (2021). Quantifying methane emissions from coal mining ventilation shafts using an unmanned aerial  
419 vehicle (UAV)-based active AirCore system. *Atmospheric Environment: X*, 12

420 Cardoso-Saldana, F.J., & Allen, D.T. (2020). Projecting the Temporal Evolution of Methane Emissions  
421 from Oil and Gas Production Sites. *Environ Sci Technol*, 54, 14172-14181

422 Caulton, D.R., Qi, L., Bou-Zeid, E., Lu, J., Zondlo, M.A.J.A.C., & Physics (2017). Improving Mobile  
423 Platform Gaussian-Derived Emission Estimates Using Hierarchical Sampling and Large Eddy  
424 Simulation, 1-39

425 Elder, C.D., Thompson, D.R., Thorpe, A.K., Hanke, P., Walter Anthony, K.M., & Miller, C.E. (2020).  
426 Airborne Mapping Reveals Emergent Power Law of Arctic Methane Emissions. *Geophysical Research*  
427 *Letters*, 47

428 Feng, L., Palmer, P.I., B?Sch, H., Parker, R.J., Webb, A.J., Correia, C.S.C., Deutscher, N.M., Domingues,  
429 L.G., Feist, D.G., Gatti, L.V.J.A.C., & Physics (2016). Consistent regional fluxes of CH<sub>4</sub> and CO<sub>2</sub>  
430 inferred from GOSAT proxy XCH<sub>4</sub> : XCO<sub>2</sub> retrievals, 2010-2014, 17, 1-33

431 Guanter, L., Irakulis-Loitxate, I., Gorrone, J., Sanchez-Garcia, E., Cusworth, D.H., Varon, D.J., Cogliati,  
432 S., & Colombo, R. (2021). Mapping methane point emissions with the PRISMA spaceborne imaging  
433 spectrometer. *Remote Sensing of Environment*, 265

434 Hersbach, H., Bell, B., Berrisford, P., Hirahara, S., Horanyi, A., Munoz-Sabater, J., Nicolas, J., Peubey,  
435 C., Radu, R., Schepers, D., Simmons, A., Soci, C., Abdalla, S., Abellan, X., Balsamo, G., Bechtold, P.,  
436 Biavati, G., Bidlot, J., Bonavita, M., De Chiara, G., Dahlgren, P., Dee, D., Diamantakis, M., Dragani, R.,  
437 Flemming, J., Forbes, R., Fuentes, M., Geer, A., Haimberger, L., Healy, S., Hogan, R.J., Holm, E.,  
438 Janiskova, M., Keeley, S., Laloyaux, P., Lopez, P., Lupu, C., Radnoti, G., de Rosnay, P., Rozum, I.,  
439 Vamborg, F., Villaume, S., & Thepaut, J.N. (2020). The ERA5 global reanalysis. *Quarterly Journal Of*  
440 *the Royal Meteorological Society*, 146, 1999-2049

441 Iwaszenko, S., Kalisz, P., Slota, M., & Rudzki, A. (2021). Detection of Natural Gas Leakages Using a

442 Laser-Based Methane Sensor and UAV. *Remote Sensing*, 13

443 Krings, T., Neining, B., Gerilowski, K., Krautwurst, S., Buchwitz, M., Burrows, J.P., Lindemann, C.,  
444 Ruhtz, T., Schuttemeyer, D., & Bovensmann, H. (2018). Airborne remote sensing and in situ  
445 measurements of atmospheric CO<sub>2</sub> to quantify point source emissions. *Atmospheric Measurement*  
446 *Techniques*, 11, 721-739

447 Liu, D., & Michalski, K.A. (2016). Comparative study of bio-inspired optimization algorithms and their  
448 application to dielectric function fitting. *Journal of Electromagnetic Waves and Applications*, 30, 1885-  
449 1894

450 Liu, F., Duncan, B.N., Krotkov, N.A., Lamsal, L.N., Beirle, S., Griffin, D., McLinden, C.A., Goldberg,  
451 D.L., & Lu, Z.F. (2020). A methodology to constrain carbon dioxide emissions from coal-fired power  
452 plants using satellite observations of co-emitted nitrogen dioxide. *Atmospheric Chemistry and Physics*,  
453 20, 99-116

454 Mays, K.L., Shepson, P.B., Stirm, B.H., Karion, A., Sweeney, C., & Gurney, K.R. (2009). Aircraft-Based  
455 Measurements of the Carbon Footprint of Indianapolis. *Environmental Science & Technology*, 43, 7816-  
456 7823

457 Nathan, B.J., Golston, L.M., O'Brien, A.S., Ross, K., Harrison, W.A., Tao, L., Lary, D.J., Johnson, D.R.,  
458 Covington, A.N., & Clark, N.N. (2015a). Near-Field Characterization of Methane Emission Variability  
459 from a Compressor Station Using a Model Aircraft. *Environmental Science & Technology*, 49, 7896-7903

460 Nathan, B.J., Golston, L.M., O'Brien, A.S., Ross, K., Harrison, W.A., Tao, L., Lary, D.J., Johnson, D.R.,  
461 Covington, A.N., Clark, N.N., & Zondlo, M.A. (2015b). Near-Field Characterization of Methane  
462 Emission Variability from a Compressor Station Using a Model Aircraft. *Environ Sci Technol*, 49, 7896-  
463 7903

464 Pan, G., Xu, Y., & Huang, B. (2021). Evaluating national and subnational CO<sub>2</sub> mitigation goals in China's  
465 thirteenth five-year plan from satellite observations. *Environ Int*, 156, 106771

466 Robertson, A.M., Edie, R., Snare, D., Soltis, J., Field, R.A., Burkhart, M.D., Bell, C.S., Zimmerle, D., &  
467 Murphy, S.M. (2017). Variation in Methane Emission Rates from Well Pads in Four Oil and Gas Basins  
468 with Contrasting Production Volumes and Compositions. *Environmental Science & Technology*, 51,  
469 8832-8840

470 Schneising, O., Buchwitz, M., Reuter, M., Vanselow, S., Bovensmann, H., & Burrows, J.P. (2020).  
471 Remote sensing of methane leakage from natural gas and petroleum systems revisited. *Atmospheric*  
472 *Chemistry and Physics*, 20, 9169-9182

473 Shah, A., Pitt, J.R., Ricketts, H., Leen, J.B., & Allen, G. (2019). Testing the near-field Gaussian plume  
474 inversion flux quantification technique using unmanned aerial vehicle sampling

475 Shi, T., Han, G., Ma, X., Zhang, M., Pei, Z., Xu, H., Qiu, R., Zhang, H., & Gong, W. (2020a). An  
476 inversion method for estimating strong point carbon dioxide emissions using a differential absorption  
477 Lidar. *Journal of Cleaner Production*, 271

478 Shi, T.Q., Ma, X., Han, G., Xu, H., Qiu, R.N., He, B., & Gong, W. (2020b). Measurement of CO<sub>2</sub> rectifier  
479 effect during summer and winter using ground-based differential absorption LiDAR. *Atmospheric*  
480 *Environment*, 220, 10

481 Tu, Q.S., Hase, F., Schneider, M., Garcia, O., Blumenstock, T., Borsdorff, T., Frey, M., Khosrawi, F.,  
482 Lorente, A., Alberti, C., Bustos, J.J., Butz, A., Carreno, V., Cuevas, E., Curcoll, R., Diekmann, C.J.,  
483 Dubravica, D., Ertl, B., Estruch, C., Leon-Luis, S.F., Marrero, C., Morgui, J.A., Ramos, R., Scharun, C.,  
484 Schneider, C., Sepulveda, E., Toledano, C., & Torres, C. (2022). Quantification of CH<sub>4</sub> emissions from  
485 waste disposal sites near the city of Madrid using ground- and space-based observations of COCCON,



486 TROPOMI and IASI. *Atmospheric Chemistry and Physics*, 22, 295-317  
487 Varon, D.J., Jacob, D.J., Jervis, D., & McKeever, J. (2020). Quantifying Time-Averaged Methane  
488 Emissions from Individual Coal Mine Vents with GHGSat-D Satellite Observations. *Environmental*  
489 *Science & Technology*, 54, 10246-10253  
490 Varon, D.J., McKeever, J., Jervis, D., Maasackers, J.D., Pandey, S., Houweling, S., Aben, I., Scarpelli,  
491 T., & Jacob, D.J. (2019). Satellite Discovery of Anomalously Large Methane Point Sources From Oil/Gas  
492 Production. *Geophysical Research Letters*, 46, 13507-13516  
493 Venkatram, A. (1996). An examination of the Pasquill-Gifford-Turner dispersion scheme. *Atmospheric*  
494 *Environment*, 30, 1283-1290  
495 Wolff, S., Ehret, G., Kiemle, C., Amediek, A., Quatrevalet, M., Wirth, M., & Fix, A. (2021a).  
496 Determination of the emission rates of CO<sub>2</sub> point sources with airborne lidar. *Atmos. Meas. Tech.*, 14,  
497 2717-2736  
498 Wolff, S., Ehret, G., Kiemle, C., Amediek, A., Quatrevalet, M., Wirth, M., & Fix, A. (2021b).  
499 Determination of the emission rates of CO<sub>2</sub> point sources with airborne lidar.  
500 *Atmospheric Measurement Techniques*, 14, 2717-2736  
501 Zhang, Y., Gautam, R., Pandey, S., Omara, M., Maasackers, J.D., Sadavarte, P., Lyon, D., Nesser, H.,  
502 Sulprizio, M.P., Varon, D.J., Zhang, R., Houweling, S., Zavala-Araiza, D., Alvarez, R.A., Lorente, A.,  
503 Hamburg, S.P., Aben, I., & Jacob, D.J. (2020). Quantifying methane emissions from the largest oil-  
504 producing basin in the United States from space. *Sci Adv*, 6, eaaz5120  
505 Zheng, B., Chevallier, F., Ciais, P., Broquet, G., Wang, Y., Lian, J., & Zhao, Y. (2020). Observing carbon  
506 dioxide emissions over China's cities and industrial areas with the Orbiting Carbon Observatory-2.  
507 *Atmospheric Chemistry And Physics*, 20, 8501-8510  
508 Zhou, X.C., Yoon, S.J., Mara, S., Falk, M., Kuwayama, T., Tran, T., Cheadle, L., Nyarady, J., Croes, B.,  
509 Scheehle, E., Herner, J.D., & Vijayan, A. (2021). Mobile sampling of methane emissions from natural  
510 gas well pads in California. *Atmospheric Environment*, 244  
511
